# Supplementary material for: Noncanonical role for the binding protein in substrate uptake by the MetNI methionine ATP Binding Cassette (ABC) transporter
Source: PubMed Central journal article supplement — Proc Natl Acad Sci U S A. 2018 Oct 23;115(45):E10596–604. doi: 10.1073/pnas.1811003115 (PMC6233128; doi:10.1073/pnas.1811003115), 2018-10-23
Supplement: pnas.1811003115.sapp.pdf [file pnas.1811003115.sapp.pdf]

## Supplementary Information for

### **A non-canonical role for the binding protein in substrate uptake by the MetNI methionine ATP Binding Cassette (ABC) importer**

Phong T. Nguyen, Jeffrey Y. Lai, Allen T. Lee, Jens T. Kaiser, Douglas C. Rees

corresponding author:

Douglas C. Rees

Email: [dcrees@caltech.edu](mailto:dcrees@caltech.edu)

#### **This PDF file includes:**

Figs. S1 to S6

Table S1

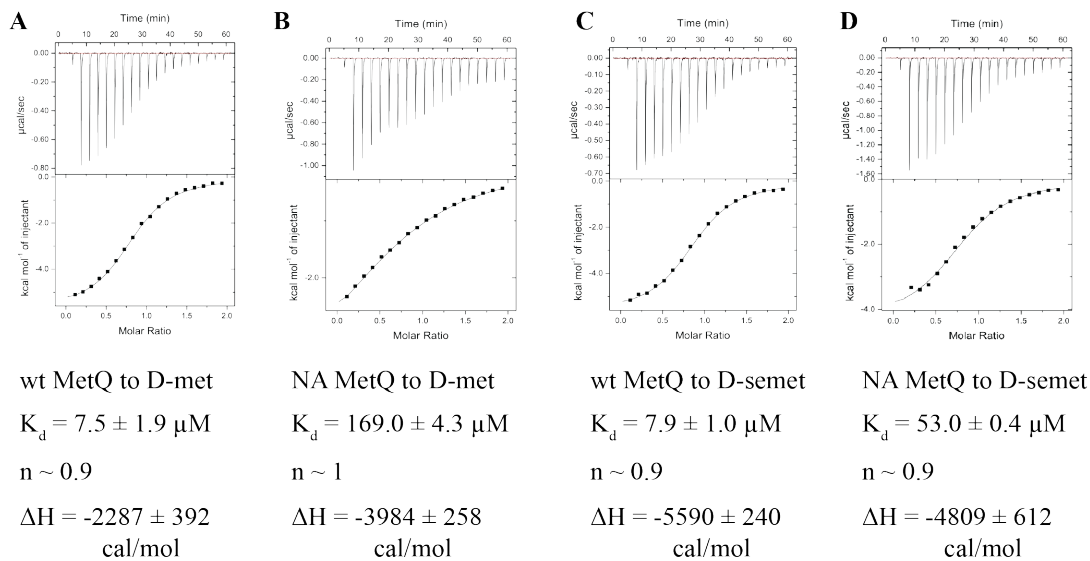

**Fig. S1. Isothermal titration calorimetry studies of the binding of MetNIQ and MetQ variants to D-methionine and D-selenomethionine**

ITC titrations of MetQ variants, including wildtype (wt) MetQ and N229A MetQ (NA MetQ) to D-methionine (A, B) and D-selenomethionine (D-semet) (C, D), respectively.

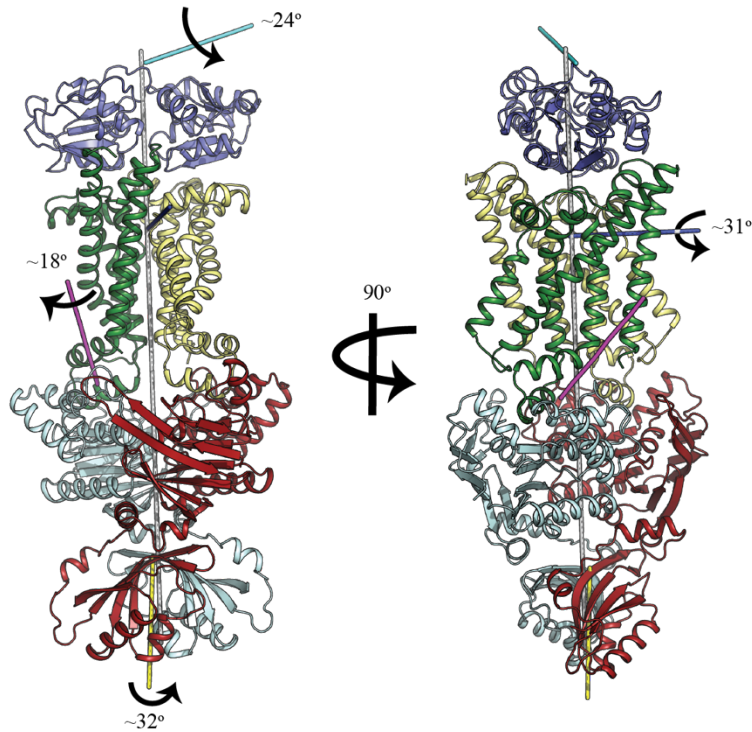

**Fig. S2. Relationships between the inward and outward facing MetNIQ structures**

Comparison of the relationships between subunits and domains of the OWF MetNIQ structure to those of the free methionine-bound (holo-) MetQ and IWF MetNI structures. The rotation axes (depicted as colored rods with corresponding rotation angles in degrees) were calculated from the transformations associated with superimposing the appropriate subunits or domains of the OWF (reported here) and IWF (PDB 3TUI) structures. The rotation axes are shown for the conversion between holo-MetQ and the structure in the MetNIQ complex (cyan), and for the interconversion between IWF and OWF conformations for the transmembrane MetI (red), the MetN nucleotide binding domains (magenta), and the C2 domains (blue).

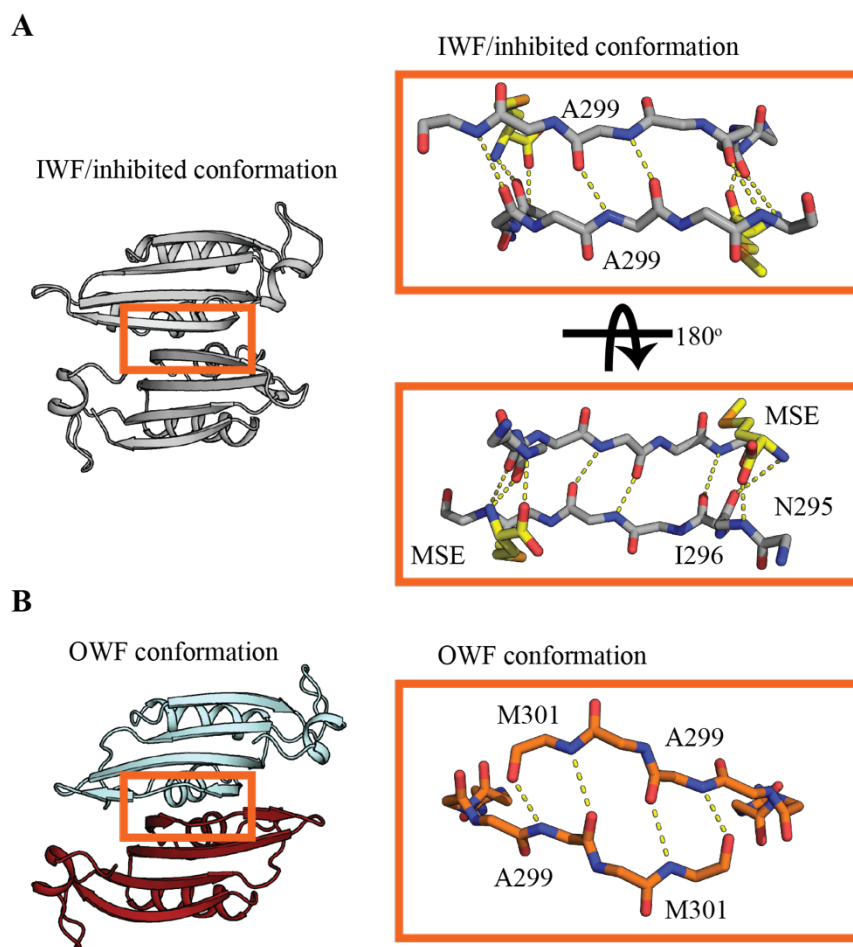

**Fig. S3. Hydrogen-bonding shifts at the interface of C2 domains**

View down the molecular twofold axis of the C2 domains illustrating the rearrangements associated with the transition between (A) the inward facing and (B) outward facing conformations. The panels on the right illustrate the accompanying shifts in hydrogen-bonding network (yellow dashes) in the  $\beta$ -sheet at the interface between C2 dimers. In the IWF conformation, residue A299 from one C2 domain forms interstrand hydrogen bonds to the same residue on the other domain, while in the OWF state, the A299 is hydrogen bonded to M301 from the other C2 domain. Binding of L-selenomethionine (MSE) helps stabilize the IWF conformation by interacting with N295 across the C2 domain dimer interface (PDB: 3TUZ).

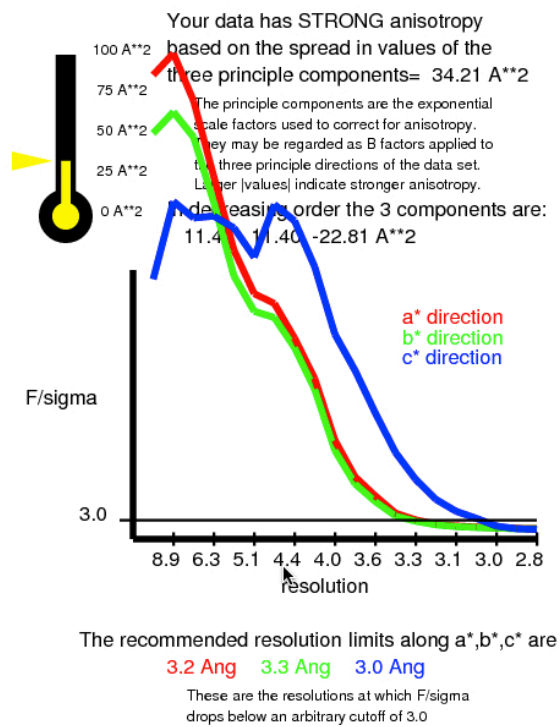

**Fig. S4. Ellipsoidal truncation and anisotropic scaling of the MetNIQ diffraction data**

Diffraction data collected from a MetNIQ crystal were ellipsoidally truncated and scaled by the UCLA MBI Diffraction Anisotropy Server (<http://services.mbi.ucla.edu/anisotropy>). Data were truncated along the directions a\*, b\*, and c\* to resolution 3.2 Å, 3.3 Å and 3.0 Å respectively, where F/sigma drops below 3.0.

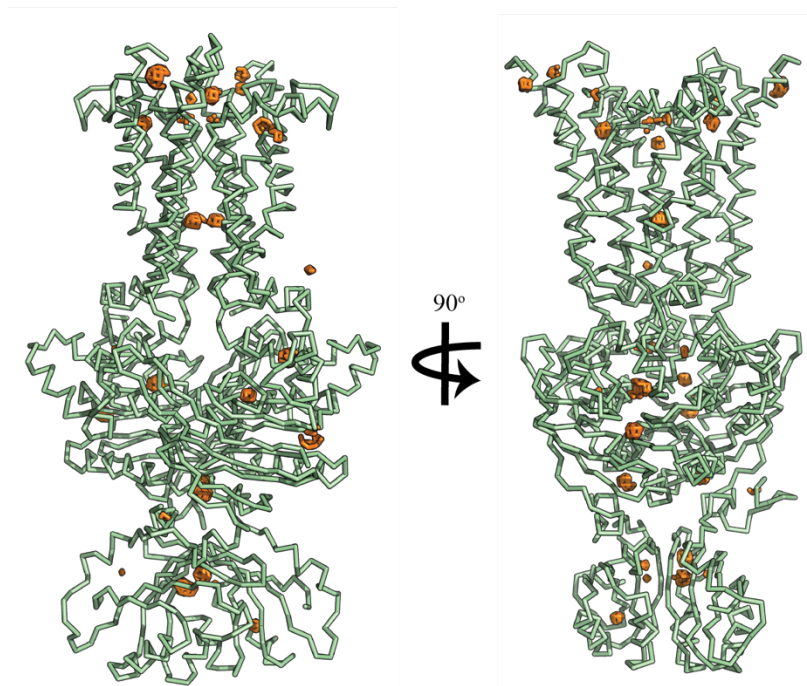

**Fig. S5. Anomalous difference Fourier map**

The anomalous difference Fourier map, contoured at  $4.5 \sigma$  (standard deviation of the map; orange mesh) was calculated from the selenomethionine SAD data with heavy-atom (selenium) sites derived from MR-SAD experimental phasing. MetQ contains no methionines and is omitted in this figure.

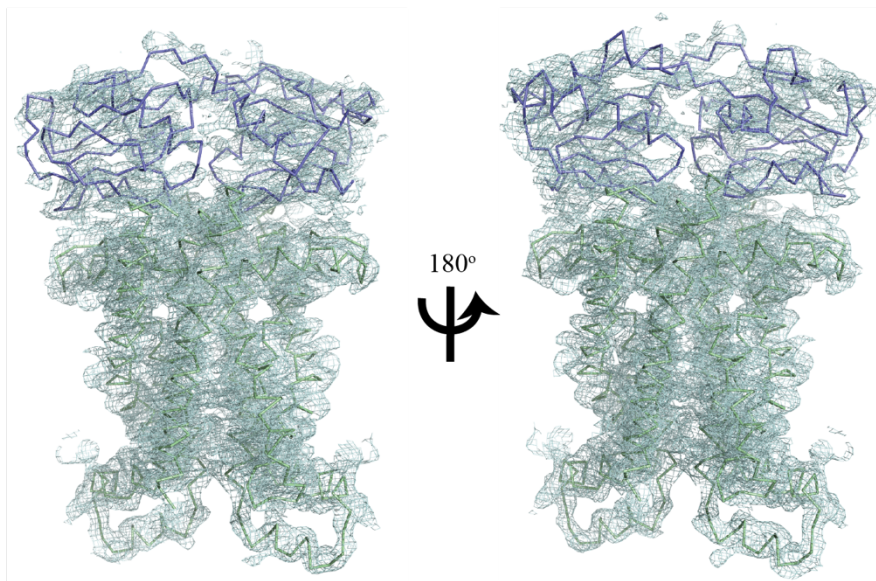

**Fig. S6. Electron density map covering the MetQ and MetI subunits**

The electron density map covering the MetQ and MetI subunits (pale cyan mesh), contoured at  $1\sigma$ , with the C $\alpha$  backbones depicted for MetQ (colored slate) and MetI (colored pale green). The map was calculated using the SIGMAA weighted amplitudes and phases following refinement of MetNIQ at 2.95 Å resolution.

**Table S1. Data collection and refinement statistics for MetNIQ (after ellipsoidal truncation and anisotropic scaling)**

| Crystal                           | Hg-derivatized MetNIQ        | Semet-substituted MetNIQ   |
|-----------------------------------|------------------------------|----------------------------|
| Wavelength (Å)                    | 1.006                        | 0.9794                     |
| Resolution range (Å)              | 39.85 - 2.954 (3.06 - 2.954) | 39.67 - 3.83 (4.13 – 3.83) |
| Space group                       | P 3 <sub>2</sub> 2 1         | P3 <sub>2</sub> 2 1        |
| Unit cell (a, c (Å))              | 107.96, 354.52               | 108.44, 349.12             |
| Total reflections                 | 820977 (9198)                | 232585 (46442)             |
| Unique reflections                | 43069 (534)                  | 23735 (4691)               |
| Multiplicity                      | 19.1 (17.0)                  | 9.8 (9.9)                  |
| Completeness (%)                  | 83.54 (10.50)                | 99.40 (97.60)              |
| Mean I/sigma(I)                   | 15.04 (1.48)                 | 6.8 (1.9)                  |
| Wilson B-factor (Å <sup>2</sup> ) | 92.7                         | 121.09                     |
| R-merge                           | 0.129 (1.89)                 | 0.342 (2.618)              |
| R-meas                            | 0.133 (1.95)                 | 0.380 (2.914)              |
| R-pim                             | 0.0306 (0.458)               | 0.165 (1.267)              |
| CC1/2                             | 0.999 (0.568)                | 0.993 (0.527)              |
| CC*                               | 1 (0.851)                    |                            |
| Reflections used in refinement    | 42966 (535)                  |                            |
| Reflections used for R-free       | 2173 (29)                    |                            |
| R-work                            | 0.209 (0.444)                |                            |
| R-free                            | 0.228 (0.511)                |                            |
| CC(work)                          | 0.867 (0.495)                |                            |



|                                    |               |  |
|------------------------------------|---------------|--|
| CC(free)                           | 0.799 (0.451) |  |
| Number of non-hydrogen atoms       | 10359         |  |
| macromolecules                     | 10292         |  |
| ligands                            | 67            |  |
| Protein residues                   | 1344          |  |
| RMS (bonds) (Å)                    | 0.010         |  |
| RMS (angles) (°)                   | 1.11          |  |
| Ramachandran favored (%)           | 93.10         |  |
| Ramachandran allowed (%)           | 6.75          |  |
| Ramachandran outliers (%)          | 0.15          |  |
| Rotamer outliers (%)               | 2.04          |  |
| Clashscore                         | 8.47          |  |
| Average B-factor (Å <sup>2</sup> ) | 108.42        |  |
| macromolecules                     | 108.64        |  |
| ligands                            | 75.27         |  |
| Number of TLS groups               | 31            |  |

Statistics for the highest-resolution shell are shown in parentheses.

The diffraction dataset used in the refinement was collected from a K<sub>2</sub>HgI<sub>4</sub> soaked crystal.

The twin fractions determined by Xtriage (Phenix) of the Hg-derivatized and Semet-substituted crystals are 0.28 and 0.10, respectively.
